# Supplementary material for: Circulating Galectin-3 in Patients with Cardiogenic Shock Complicating Acute Myocardial Infarction Treated with Mild Hypothermia: A Biomarker Sub-Study of the SHOCK-COOL Trial
Source: MDPI journal article supplement (doi:10.3390/jcm11237168), 2022-12-02
Supplement: s1 [file s1]

**Table S1. Differences in Gal-3 levels between the MTH and Control groups on day 1, day 2, and day 3.**

| Gal-3<br>(ng/ml)   | MTH vs. Control*      | p-value | MTH vs. Control*      | p-value | MTH vs. Control*      | p-value | P for<br>interaction<br>& |
|--------------------|-----------------------|---------|-----------------------|---------|-----------------------|---------|---------------------------|
|                    | Day 1                 |         | Day 2                 |         | Day 3                 |         |                           |
| Before imputation  | -1.34 (-4.67 to 1.14) | 0.223   | -0.37 (-2.50 to 1.26) | 0.532   | 0.27 (-1.31 to 1.74)  | 0.770   | 0.242                     |
| After imputation 1 | -0.70 (-3.37 to 1.75) | 0.380   | -0.37 (-2.30 to 1.16) | 0.497   | 0.16 (-0.69 to 1.40)  | 0.836   | 0.240                     |
| After imputation 2 | -0.75 (-3.88 to 1.49) | 0.310   | 0.19 (-1.24 to 1.50)  | 0.846   | 0.96 (-0.36 to 2.06)  | 0.208   | 0.209                     |
| After imputation 3 | -1.02 (-3.42 to 1.72) | 0.324   | -0.11 (-1.55 to 1.16) | 0.597   | 0.43 (-0.62 to 1.53)  | 0.425   | 0.192                     |
| After imputation 4 | -0.61 (-3.37 to 1.87) | 0.470   | -0.76 (-2.50 to 0.56) | 0.220   | -0.30 (-1.08 to 0.91) | 0.653   | 0.327                     |
| After imputation 5 | -0.61 (-3.37 to 1.87) | 0.474   | -0.14 (-1.8 to 1.23)  | 0.774   | 0.40 (-0.56 to 1.55)  | 0.524   | 0.214                     |

\* Results are expressed as median difference and 95% confidence interval.    & Interaction of Gal-3 in the MTH and Control groups over time.  
MTH, Mild therapeutic hypothermia. Gal-3, galectin-3.

**Table S2. Multiple comparisons of Gal-3 differences within the MTH and Control groups during three days of hospitalization.**

| MTH Group                      |                          |                          |                         |                 |                  |                  | Control Group            |                          |                         |                  |                   |                 |
|--------------------------------|--------------------------|--------------------------|-------------------------|-----------------|------------------|------------------|--------------------------|--------------------------|-------------------------|------------------|-------------------|-----------------|
| Gal-3<br>(ng/ml)               | Day 1<br>Median<br>(IQR) | Day 2<br>Median<br>(IQR) | Day3<br>Median<br>(IQR) | Dunn's test*    |                  |                  | Day 1<br>Median<br>(IQR) | Day 2<br>Median<br>(IQR) | Day3<br>Median<br>(IQR) | Dunn's test*     |                   |                 |
|                                |                          |                          |                         | Day 1 vs 2      | Day 1 vs 3       | Day 2 vs 3       |                          |                          |                         | Day 1 vs 2       | Day 1 vs 3        | Day 2 vs 3      |
| Before multiple<br>Imputation  | 3.08<br>(1.45-6.40)      | 2.39<br>(1.22-4.39)      | 2.24<br>(0.97-4.38)     | 4.09;<br>p>0.99 | 4.58;<br>p>0.99  | 0.49;<br>p>0.99  | 3.84<br>(2.04-13.3)      | 3.0<br>(1.38-6.09)       | 1.79<br>(1.23-3.50)     | 7.34;<br>p=0.39  | 12.06;<br>p=0.049 | 4.71;<br>p>0.99 |
| After multiple<br>imputation 1 | 3.17<br>(1.46-6.65)      | 2.39<br>(1.34-4.08)      | 2.21<br>(0.65-4.12)     | 6.15;<br>p=0.80 | 9.15;<br>p=0.29  | 3.0;<br>p>0.99   | 3.81<br>(2.04-12.93)     | 3.0<br>(1.38-6.09)       | 1.79<br>(1.16-2.99)     | 8.5;<br>p=0.37   | 15.35;<br>p=0.016 | 6.85;<br>p=0.64 |
| After multiple<br>imputation 2 | 3.17<br>(1.46-6.37)      | 2.86<br>(1.47-4.89)      | 2.67<br>(1.84-4.38)     | 5.05;<br>p>0.99 | 4.85;<br>p>0.99  | -0.20;<br>p>0.99 | 3.81<br>(2.04-12.93)     | 1.69<br>(1.36-5.18)      | 1.42<br>(1.27-2.99)     | 10.55;<br>p=0.17 | 16.0;<br>p=0.011  | 5.45;<br>p=0.97 |
| After multiple<br>imputation 3 | 3.17<br>(1.46-6.65)      | 1.76<br>(1.31-4.08)      | 2.67<br>(1.16-4.38)     | 9.05;<br>p=0.30 | 5.5;<br>p=0.96   | -3.55;<br>p>0.99 | 3.81<br>(2.30-12.93)     | 1.68<br>(1.15-5.18)      | 1.79<br>(1.27-4.33)     | 11.6;<br>p=0.11  | 13.75;<br>p=0.038 | 2.15;<br>p>0.99 |
| After multiple<br>imputation 4 | 3.17<br>(1.46-6.65)      | 1.91<br>(0.97-4.08)      | 1.35<br>(0.73-3.33)     | 8.0;<br>p=0.44  | 12.85;<br>p=0.06 | 4.85;<br>p>0.99  | 3.81<br>(1.83-12.93)     | 3.52<br>(1.42-6.09)      | 1.53<br>(0.84-2.99)     | 5.80;<br>p=0.88  | 15.65;<br>p=0.014 | 9.85;<br>p=0.22 |
| After multiple<br>imputation 5 | 3.17<br>(1.46-6.65)      | 3.0<br>(1.42-5.14)       | 2.21<br>(0.97-4.12)     | 3.90;<br>p>0.99 | 8.55;<br>p=0.36  | 4.65;<br>p>0.99  | 3.81<br>(1.83-12.93)     | 3.0<br>(1.38-6.09)       | 1.42<br>(1.27-2.58)     | 6.40;<br>p=0.74  | 15.5;<br>p=0.015  | 9.10;<br>p=0.30 |

\*Dunn's multiple comparison test expressed by mean rank difference and p-value. MTH, Mild therapeutic hypothermia. Gal-3, galectin-3. IQR, interquartile range.
